# Supplementary material
Source: PubMed Central journal article supplement (PMC6640976)
Supplement: ao7b00558_si_001.pdf [file ao7b00558_si_001.pdf]

## Supporting Information

# All solution-processed, hybrid organic-inorganic photocathode for hydrogen evolution

*Hansel Comas Rojas,<sup>a,b,\*</sup> Sebastiano Bellani,<sup>a,c</sup> Eduardo Aluicio Sarduy,<sup>a,b</sup> Francesco Fumagalli,<sup>a</sup> Matthew T. Mayer,<sup>e</sup> Marcel Schreier,<sup>e</sup> Michael Grätzel,<sup>e</sup> Fabio Di Fonzo,<sup>a</sup> Maria Rosa Antognazza,<sup>a,\*</sup>*

<sup>a</sup> Center for Nano Science and Technology @PoliMi, Istituto Italiano di Tecnologia, Via Pascoli 70/3, 20133 Milano, Italy.

<sup>b</sup> Instituto Superior de Tecnologías y Ciencias Aplicadas (INSTEC), Salvador Allende y Luaces, AP6163 Havana, Cuba.

<sup>c</sup> Graphene Labs, Istituto Italiano di Tecnologia, via Morego 30, 16163 Genova, Italy.

<sup>d</sup> Laboratory of Photonics and Interfaces, Institute of Chemical Sciences and Engineering, Ecole Polytechnique Fédérale de Lausanne, CH-1015 Lausanne, Switzerland.

\*Corresponding authors: [hcomas@instec.cu](mailto:hcomas@instec.cu); [mariarosa.antognazza@iit.it](mailto:mariarosa.antognazza@iit.it)

## EXPERIMENTAL METHODS

### Materials and photocathode fabrication

Photocathodes were fabricated on commercial fluorine-doped tin oxide (FTO) coated soda-lime glass substrates (Dyesol Italia SRL, dimensions 20 x 12 x 2.1 mm, FTO thickness 250 nm and sheet resistance 15 Ohm/sq). Substrates were cleaned by subsequent ultrasonic baths lasting 20 minutes each (alkaline detergent HELLMANEX 3%, ultrapure water, acetone, isopropyl alcohol). After each step the substrates were dried under a nitrogen flow. A subsequent overnight drying at 130° C allowed full solvent evaporation. An oxygen inductively coupled plasma treatment (DIENER, 40 Pa, 300 W for 20 minutes) completed the substrate preparation procedure.

Cuprous iodide (CuI, Sigma Aldrich, 97% purity) was dissolved in acetonitrile (Sigma Aldrich, ACS grade) at 10 g/L concentration. CuI deposition was carried out by means of spin coating in one single step (3000 rpm rotation speed for 60 sec). Poly(3-hexylthiophene-2,5-diyl) (rr-P3HT, purchased from Sigma Aldrich and used without further purification, molecular weight MW 15000 - 45000, purity 99.995%) and fullerene derivative [6,6]-Phenyl C61 butyric acid methyl ester (PCBM, purchased from Nano-C Inc.) were individually dissolved in chlorobenzene (Sigma Aldrich, ACS grade) and then mixed at 1:1 wt. ratio and 25 g/L on a polymer basis. Blend solution was stirred overnight at 50° C. The active layer was spin-coated on top of the CuI layer in a two-step process (800 rpm for 3 sec, followed by 1600 rpm for 60 sec).

Organic-based TiO<sub>x</sub> nanoparticles (TiO<sub>x(org)</sub>) were synthesized according to ref.<sup>1</sup>. Titanium tetraisopropoxide (TTIP 97%, Sigma-Aldrich) was dissolved in a mixture ethanol/isopropanol (5:5 mL) to provide a concentration of 0.05 mol/L. The solution was stirred for 5 minutes and then concentrated HCl was added as acid catalyst. The water present in the concentrated HCl initial solution results in a H<sub>2</sub>O/TTIP molar ratio of 0.82. The precursor solution was stirred for 72 hours at room temperature in a sealed vial. This solution was spin coated on top of BHJ surface at 1000 rpm

---

<sup>1</sup> Haro, M.; Solis, C.; Molina, G.; Otero, L.; Bisquert, J.; Gimenez, S.; Guerrero, A. Toward Stable Solar Hydrogen Generation Using Organic Photoelectrochemical Cells. *J. Phys. Chem. C* 2015, 119, 6488-6494

for 1 min and kept a Petri dish in ambient conditions for 2 h to enhance hydrolysis of  $\text{TiO}_x$  network.

A thermal treatment at 85 °C for 10 min in air was finally applied.

Aqueous-based  $\text{TiO}_2$  nanoparticles ( $\text{TiO}_{2(\text{aq})}$ ) were synthesized according to a modified sol-gel protocol.<sup>2</sup> A mixture of 15 mL of TTIP (97%, Sigma-Aldrich) and 2.5 ml of ethanol was added drop wise to 90 ml of distilled water in a three-necks, round-bottom flask to obtain a TTIP/ethanol/ $\text{H}_2\text{O}$  molar ratio of 1:0.75:83. Then, 1 mL of concentrated hydrochloric acid was added as acid catalyst and the resulting solution was refluxed under vigorous stirring for 8 h at 80° C. Finally, a stable milky dispersion of  $\text{TiO}_2$  nanoparticles was obtained at 15 wt. % concentration, under a Ti-basis. A 30 seconds, 60 W power plasma treatment (plasma 1) was applied to the surface of the BHJ to enhance the wettability of the  $\text{TiO}_{2(\text{aq})}$  dispersion. A three step-spin coating protocol was employed starting from 3 seconds at 200 rpm, 60 seconds at 1000 rpm and 30 seconds at 5000 rpm. Samples were stored in a Petri dish in ambient conditions for 1 day to enhance hydrolysis and condensation of the  $\text{TiO}_2$  nanoparticles network. Afterwards, a thermal annealing under inert atmosphere at 130° C for 10 minutes was applied followed by a second plasma treatment (plasma 2, with the same parameters used for plasma 1), just prior to catalyst deposition.

Commercial platinum nanopowder (Sigma Aldrich) was dissolved in water at 1 g/L concentration in weight and sonicated for 30 minutes. Commercial catalyst Vulcan XC-72 (20% loading platinum on graphitized-carbon powder, Sigma Aldrich) was dissolved in isopropanol at 1 g/L concentration

in weight and sonicated for 30 minutes. Commercial  $\text{MoS}_3$  powder (Thermo Fisher Scientific) was dissolved in a water:acetone mixture at volume ratio 1:2 in the presence of NaOH 1 M to a mass concentration of 3.8 g/L. The dispersion was stirred at 70° C for 2 hour and later on sonicated for 30 minutes. The three catalyst dispersions were spin coated at 2000 rpm for 60 sec each. Branched polyethyleneimine (PEI, MW 25000 g/mol, Sigma Aldrich) was dissolved in ethanol at 0.1% concentration and spin coated on top of full devices at 3000 rpm for 60 seconds.

---

<sup>2</sup> Yun, Y.J.; Chung, J.S.; Kim, S.; Hahn, S.H.; Kim, E.-J. Low-temperature coating of sol-gel anatase thin films. *Materials Letters* 2004, 58, 3703– 3706.

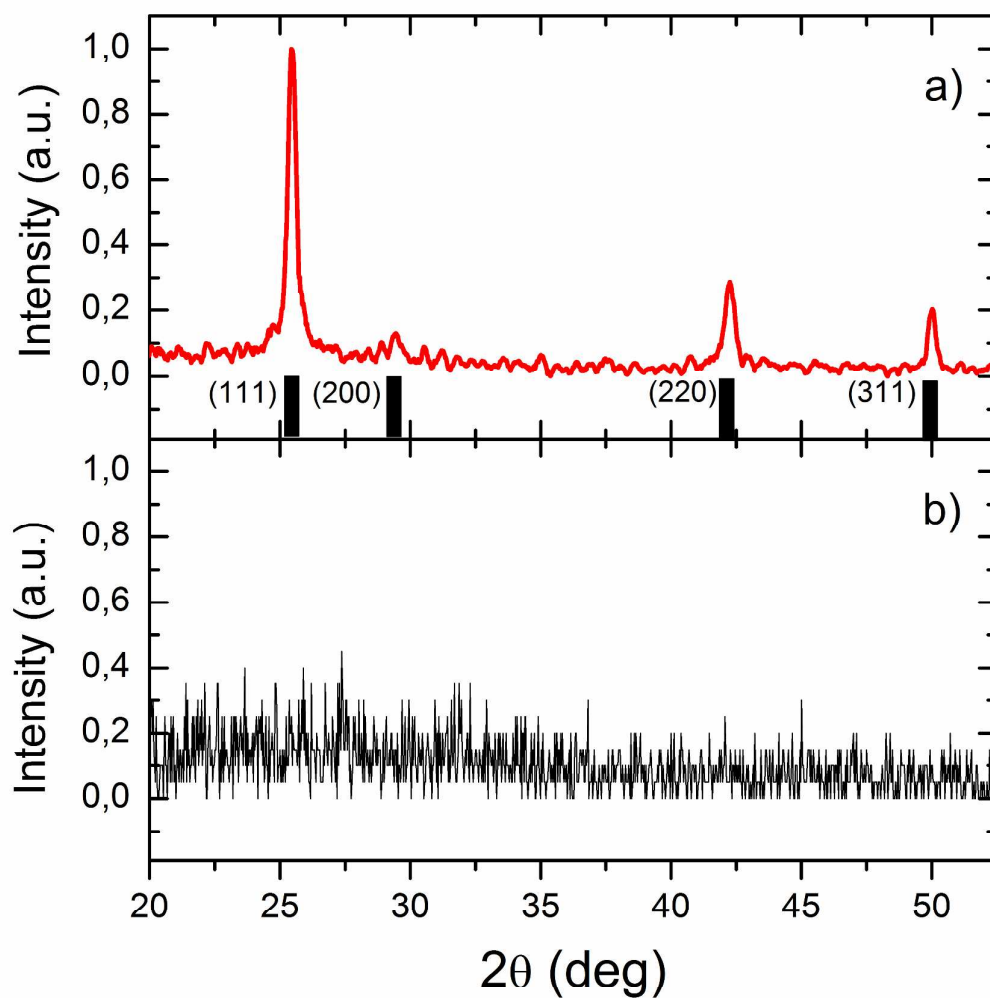

**Figure S1. Photocathodes layers structural analysis.** X-ray diffraction spectra of (a) CuI and (b) MoS<sub>3</sub> thin films spin coated over a glass substrate. Reference reflections of CuI  $\gamma$ -phase are shown as black lines for comparison.

| Materials                 | Work function (eV) | Standard Deviation (eV) |
|---------------------------|--------------------|-------------------------|
| FTO                       | 5.10               | 0.01                    |
| CuI                       | 4.87               | 0.01                    |
| TiO <sub>2</sub>          | 4.71               | 0.01                    |
| TiO <sub>2</sub> annealed | 4.70               | 0.01                    |
| MoS <sub>3</sub>          | 5.06               | 0.01                    |

**Table S1. Work function measurements.** Work function (WF) values of materials used as photocathodes layers as measured by Kelvin probe (in air). Mean values and standard deviation values are obtained over a statistical sample of  $n = 6$  independent measurements.

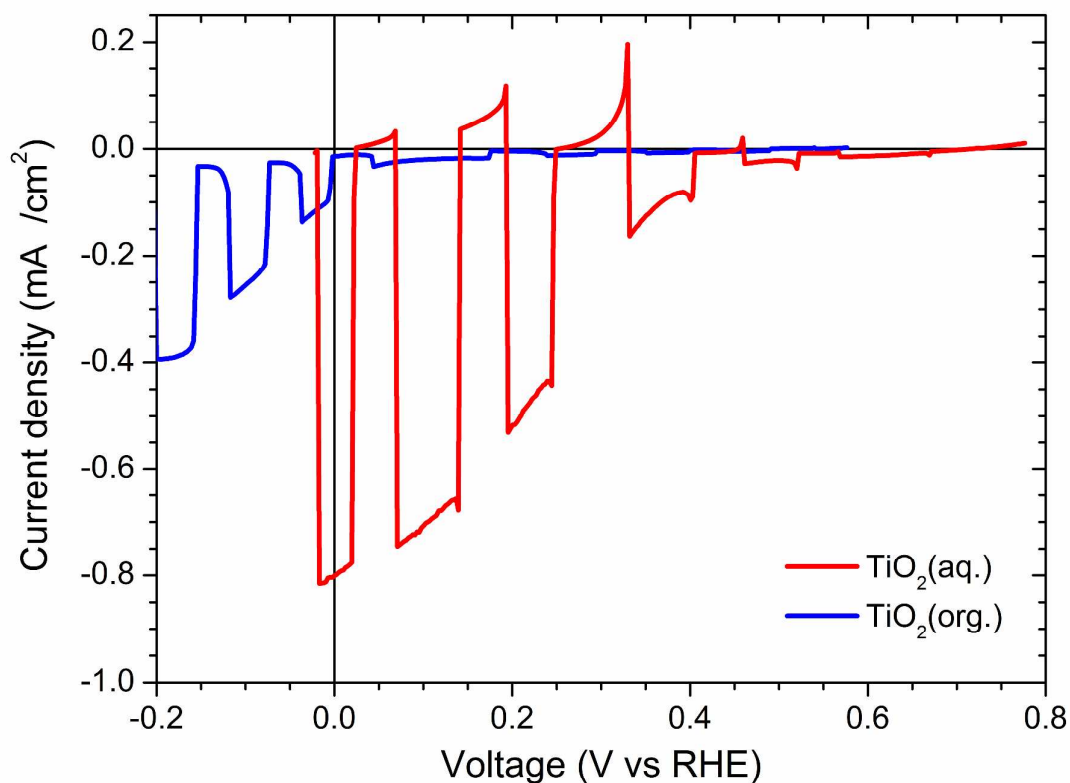

**Figure S2. Photo-electrochemical performance of photocathode architectures with different ESL layers preparation.** Current–potential characteristics of different all solution-processed photocathode architectures (FTO/CuI/P3HT:PCBM/TiO<sub>2</sub>/VC-Pt) measured at pH 1 under simulated AM 1.5G illumination and using commercial Vulcan XC-72 (VC-Pt, platinum on graphitized-carbon powder) as an electrocatalyst. The two curves show the effect of different ESL layer preparation, TiO<sub>2</sub>(org)/VC-Pt (blue solid line) and TiO<sub>2</sub>(aq)/VC-Pt (red solid line). In the latter case, the BHJ surface was treated by oxygen plasma, to facilitate the subsequent deposition of the TiO<sub>2</sub>(aq) layer.

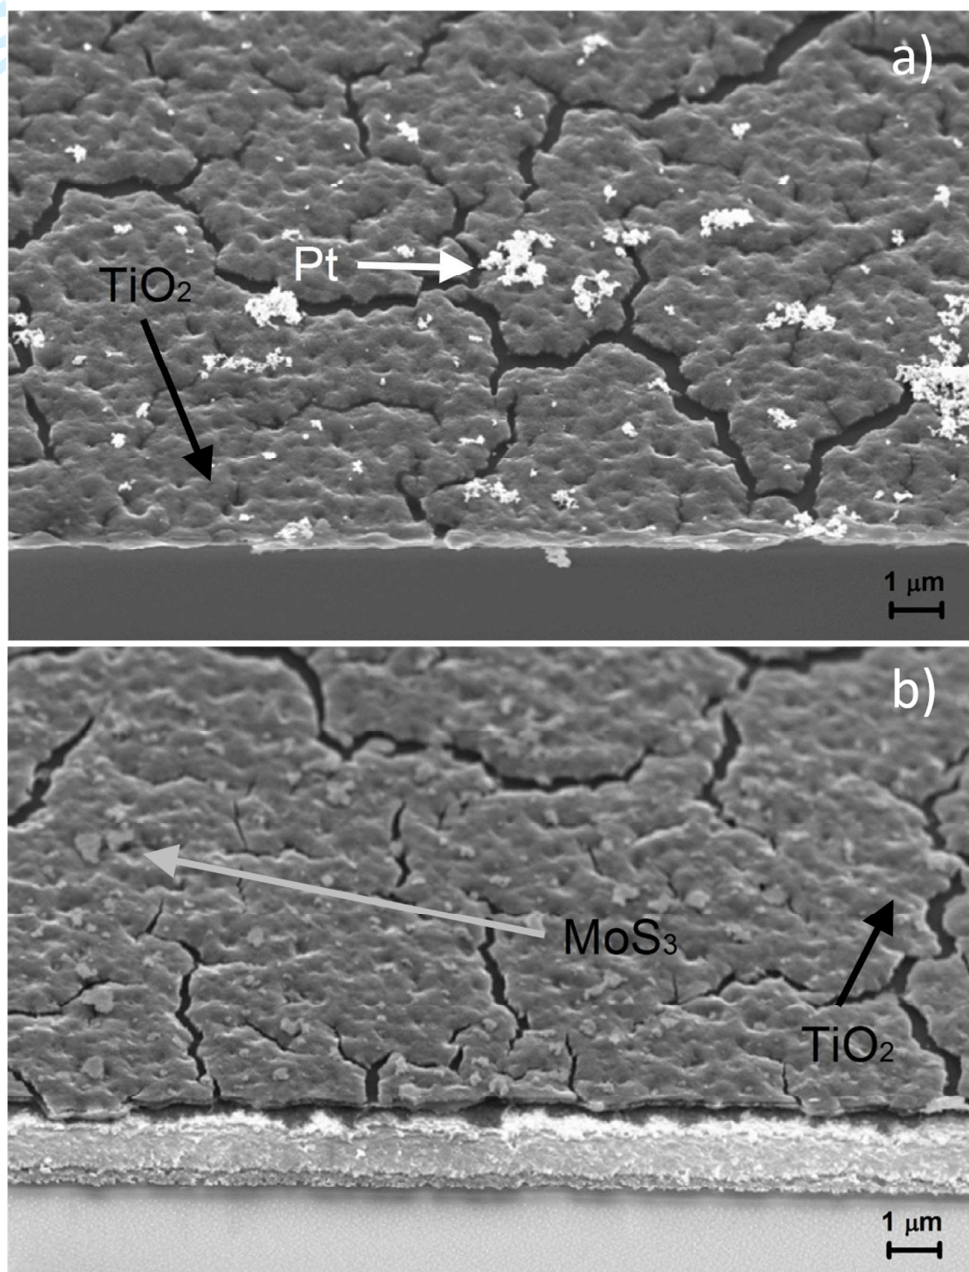

**Figure S3. SEM images (top tilted views) of the all solution-processed photocathodes: FTO/CuI/P3HT:PCBM/TiO<sub>2(aq.)</sub>/Pt (upper panel, a) and FTO/CuI/P3HT:PCBM/TiO<sub>2(aq.)</sub>/MoS<sub>3</sub> (bottom panel, b). Arrows indicate the positions of Pt (black) and MoS<sub>3</sub> (grey) agglomerates while the TiO<sub>2</sub> ESL layer is indicated by white arrows in both panels.**

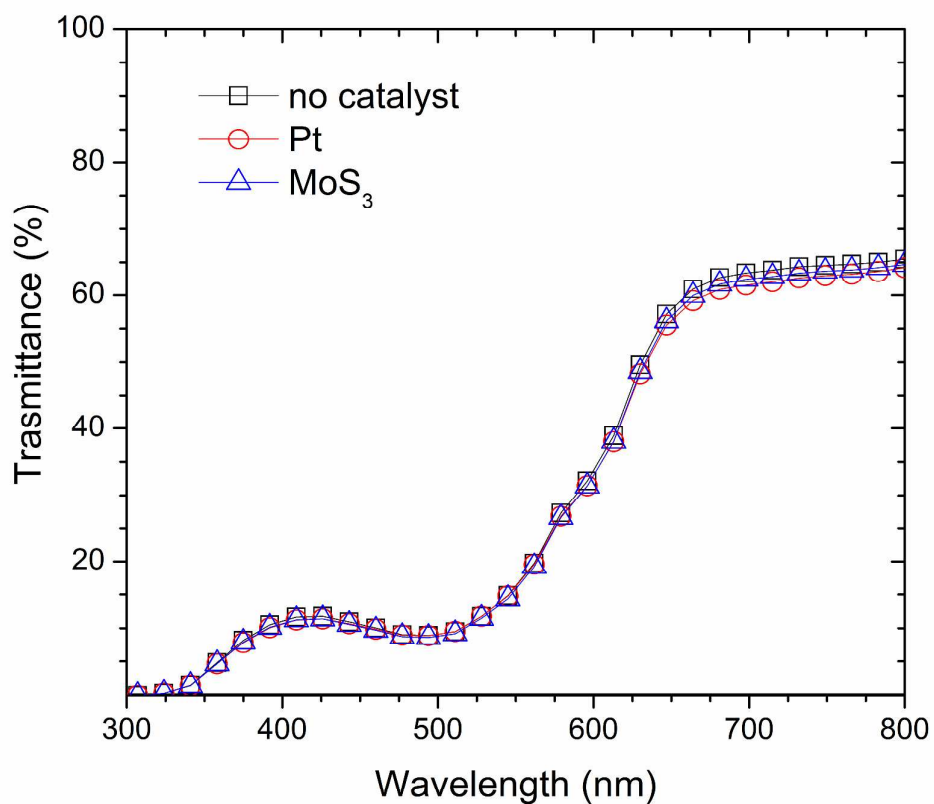

**Figure S4. Photocathodes optical characterization.** UV-visible transmission spectra of all solution- processed photocathodes fabricated with the architecture FTO/CuI/P3HT:PCBM/TiO<sub>2</sub> (aq.)/catalyst. The effect of different electrocatalysts layers is shown, Pt in red circles and MoS<sub>3</sub> in blue triangles. The transmittance of a device fabricated omitting the catalyst layer is also shown for comparison (black squares).



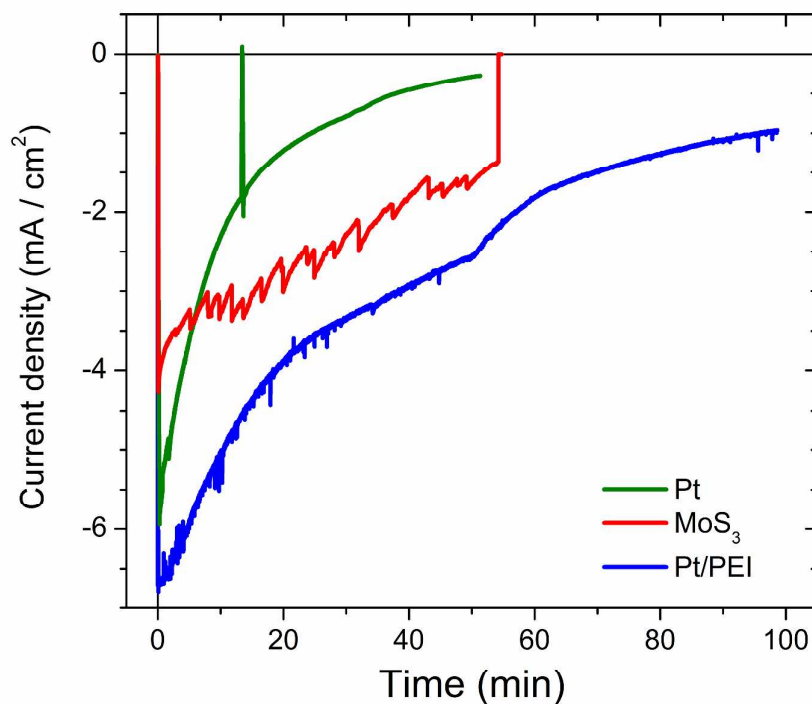

**Figure S5. Photocathodes chrono-amperometric photo-electrochemical characterization.** Photocurrent density in potentiostatic operation for the solution-processed hybrid photocathodes measured at 0 V vs. RHE and pH 1, under simulated AM 1.5G illumination. The devices were fabricated with the architecture FTO/CuI/P3HT:PCBM/TiO<sub>2(aq.)</sub>/catalyst. The catalyst layers used were Pt (in green), MoS<sub>3</sub> (in red) and the combination Pt/PEI (in blue). At certain times the illumination was chopped to show the corresponding dark current.
